# Supplementary material for: On the structure of Au11(SR)9 and Au13(SR)11 clusters
Source: Royal Society of Chemistry journal article supplement (doi:10.1039/d1cp02332b), 2021-01-01
Supplement: d1cp02332b1.pdf [file d1cp02332b1.pdf]

## Supporting Information

### On the Structure of Au<sub>11</sub>(SR)<sub>9</sub> and Au<sub>13</sub>(SR)<sub>11</sub> clusters

C. Emilio Cárdenas,<sup>a</sup> Alfredo Tlahuice-Flores<sup>a\*</sup>

<sup>a</sup> Universidad Autónoma de Nuevo León, CICFIM,-Facultad de Ciencias Físico-Matemáticas, San Nicolás de los Garza, Nuevo León, 66455, México; [tlahuicef@gmail.com](mailto:tlahuicef@gmail.com)

TABLE S1. Relative energies (eV) of Au<sub>11</sub>(SCH<sub>3</sub>)<sub>9</sub> cluster the isomers and calculated HOMO-LUMO gap values.

| Isomer       | Configuration                                                                                                       | Relative energy, eV | HOMO-LUMO gap, eV |
|--------------|---------------------------------------------------------------------------------------------------------------------|---------------------|-------------------|
| <b>Iso 1</b> | Au <sub>3</sub> +Au <sub>2</sub> (SCH <sub>3</sub> ) <sub>3</sub> +Au <sub>6</sub> (SCH <sub>3</sub> ) <sub>6</sub> | 0.000               | 1.994             |
| <b>Iso2</b>  | Au <sub>4</sub> +Au <sub>2</sub> (SCH <sub>3</sub> ) <sub>3</sub> +Au <sub>5</sub> (SCH <sub>3</sub> ) <sub>6</sub> | 0.190               | 1.312             |
| <b>Iso3</b>  | Au <sub>4</sub> +Au <sub>3</sub> (SCH <sub>3</sub> ) <sub>4</sub> +Au <sub>4</sub> (SCH <sub>3</sub> ) <sub>5</sub> | 0.338               | 1.964             |
| <b>Iso4</b>  | Au <sub>4</sub> +Au(SCH <sub>3</sub> ) <sub>2</sub> +Au <sub>6</sub> (SCH <sub>3</sub> ) <sub>7</sub>               | 0.482               | 2.1431            |

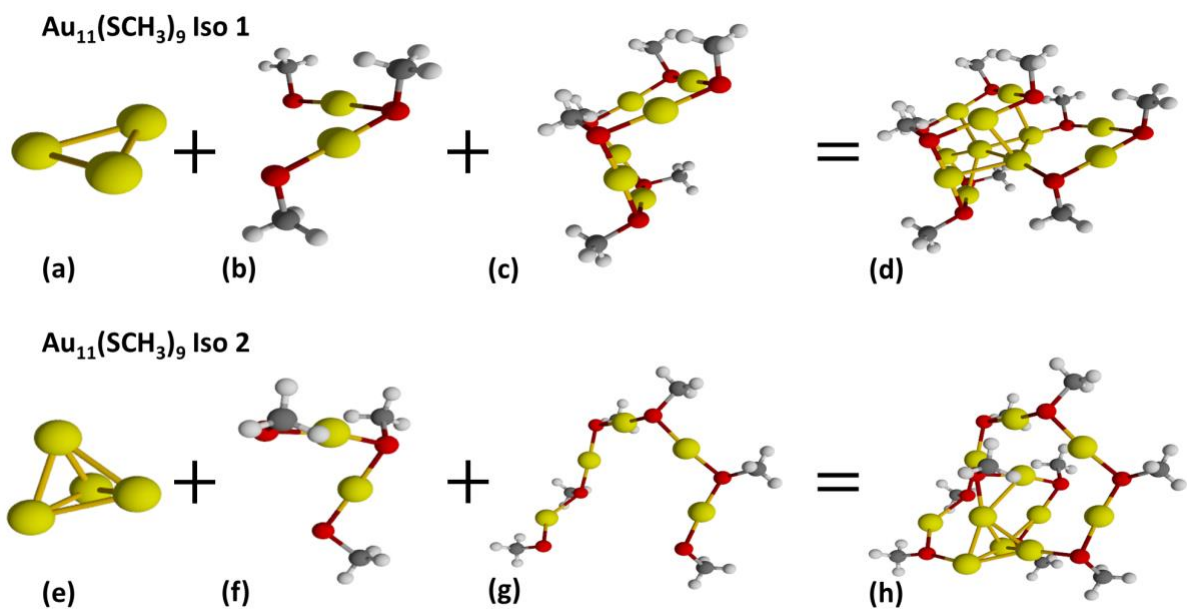

**FIG. S1.** Lowest energy isomers of  $\text{Au}_{11}(\text{SCH}_3)_9$  clusters. (a) Triangular core ( $\text{Au}_3$ ), (b) Dimer motif ( $\text{Au}_2(\text{SCH}_3)_3$ ), (c) Cyclomer ( $\text{Au}_6(\text{SCH}_3)_6$ ), (d) Iso 1 of  $\text{Au}_{11}(\text{SCH}_3)_9$  cluster, (e) Tetrahedral core ( $\text{Au}_4$ ), (f) Dimer motif ( $\text{Au}_2(\text{SCH}_3)_3$ ), (g) Pentamer motif ( $\text{Au}_5(\text{SCH}_3)_6$ ), (h) Iso 2 of  $\text{Au}_{11}(\text{SCH}_3)_9$  cluster. Color code: Gold atoms are shown in yellow, Sulphur atoms are red balls, Carbon atoms are displayed in gray, and Hydrogen atoms in white.

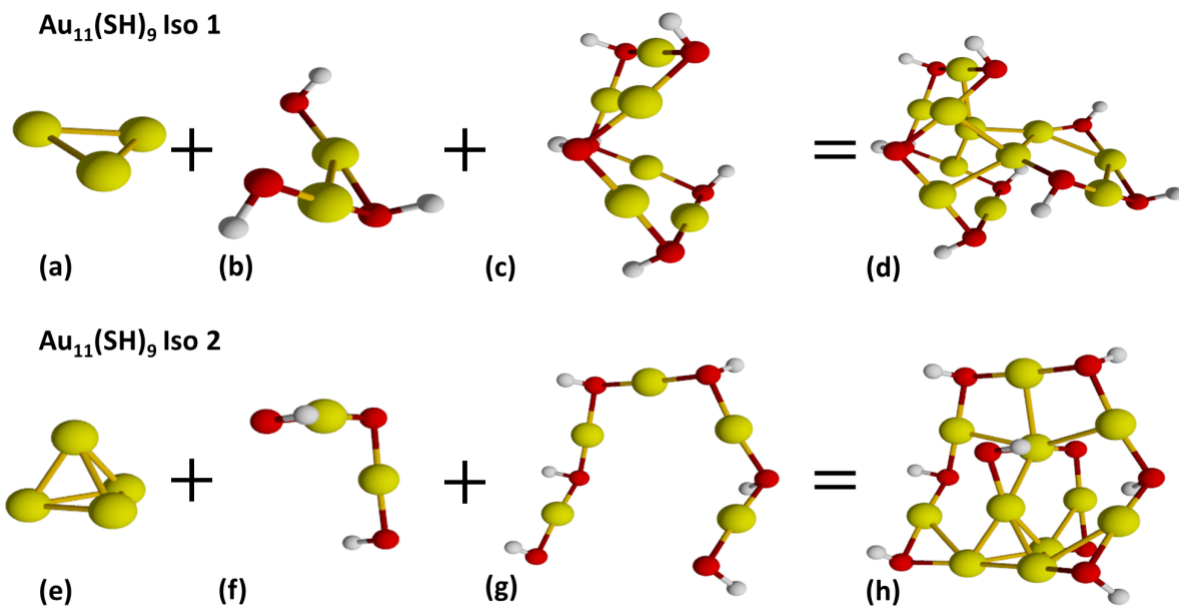

**FIG. S2.** Lowest energy isomers of  $\text{Au}_{11}(\text{SH})_9$  clusters. (a) Triangular core ( $\text{Au}_3$ ), (b) Dimer motif ( $\text{Au}_2(\text{SH})_3$ ), (c) Cyclomer ( $\text{Au}_6(\text{SH})_6$ ), (d) Iso 1 of  $\text{Au}_{11}(\text{SH})_9$  cluster, (e) Tetrahedral core ( $\text{Au}_4$ ), (f) Dimer motif ( $\text{Au}_2(\text{SH})_3$ ), (g) Pentamer motif ( $\text{Au}_5(\text{SH})_6$ ), (h) Iso 2 of  $\text{Au}_{11}(\text{SH})_9$  cluster. Color code: Gold atoms are shown in yellow, Sulphur atoms are red balls, Carbon atoms are displayed in gray, and Hydrogen atoms in white.

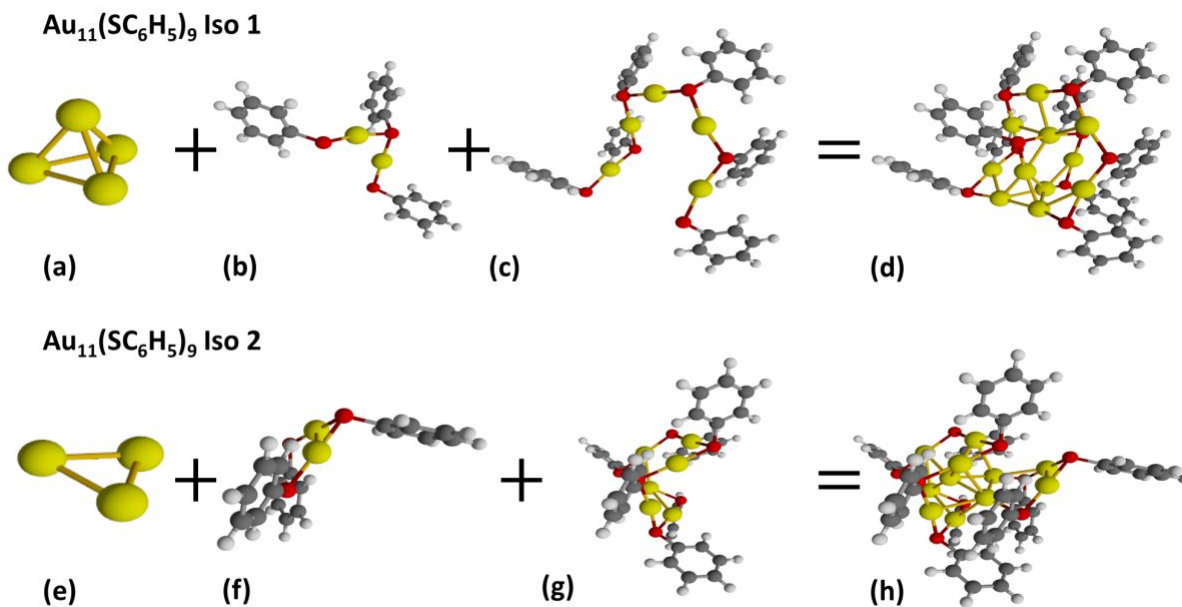

**FIG. S3.** Lowest energy isomers of  $\text{Au}_{11}(\text{SPh})_9$  clusters. (a) Tetrahedral core ( $\text{Au}_4$ ), (b) Dimer motif ( $\text{Au}_2(\text{SPh})_3$ ), (c) Pentamer motif  $\text{Au}_5(\text{SPh})_6$ , (d) Iso 1 of  $\text{Au}_{11}(\text{SPh})_9$  cluster, (e) Triangular core ( $\text{Au}_3$ ), (f) Dimer motif ( $\text{Au}_2(\text{SPh})_3$ ), (g) cyclomer motif ( $\text{Au}_6(\text{SPh})_6$ ), (h) Iso 2 of  $\text{Au}_{11}(\text{SPh})_9$  cluster. Color code: Gold atoms are shown in yellow, Sulphur atoms are red balls, Carbon atoms are displayed in gray, and Hydrogen atoms in white.

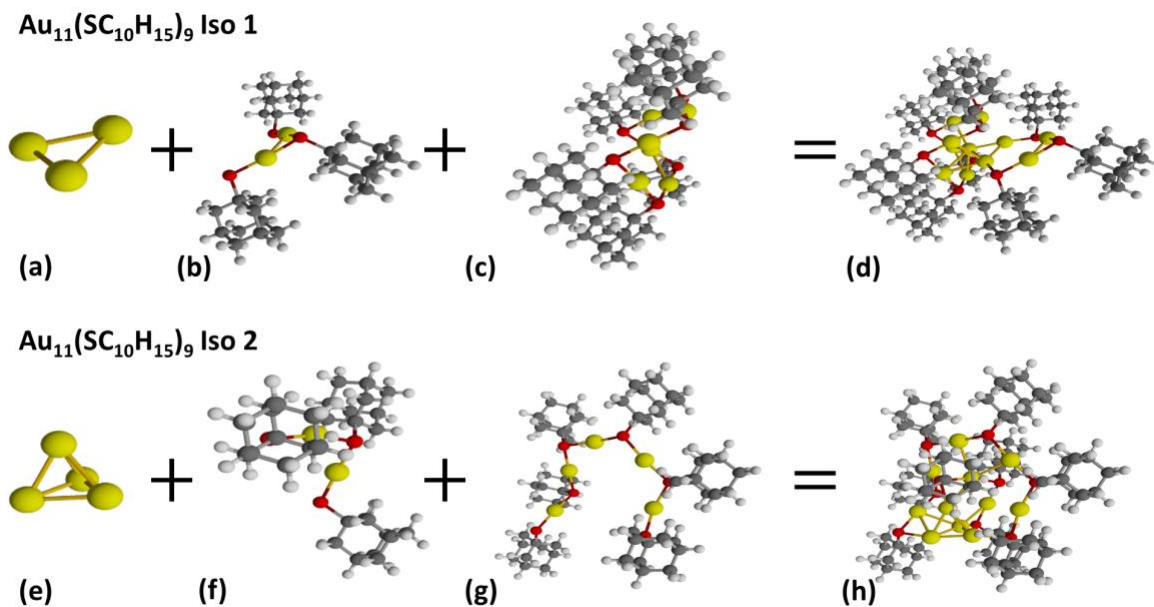

**FIG. S4.** Lowest energy isomers of  $\text{Au}_{11}(\text{SR})_9$  clusters with R= adamantyl ( $\text{SC}_{10}\text{H}_{15}$ ). (a) Triangular core ( $\text{Au}_3$ ), (b) Dimer motif ( $\text{Au}_2(\text{SC}_{10}\text{H}_{15})_3$ ), (c) cyclomer motif  $\text{Au}_6(\text{SC}_{10}\text{H}_{15})_6$ , (d) Iso 1 of  $\text{Au}_{11}(\text{SC}_{10}\text{H}_{15})_9$  cluster, (e) Tetrahedral core ( $\text{Au}_4$ ), (f) Dimer motif ( $\text{Au}_2(\text{SC}_{10}\text{H}_{15})_3$ ), (g) pentamer motif ( $\text{Au}_5(\text{SC}_{10}\text{H}_{15})_6$ ), (h) Iso 2 of  $\text{Au}_{11}(\text{SC}_{10}\text{H}_{15})_9$  cluster. Color code: Gold atoms are shown in yellow, Sulphur atoms are red balls, Carbon atoms are displayed in gray, and Hydrogen atoms in white.

TABLE S2. Relative energies (eV) of  $\text{Au}_{13}(\text{SCH}_3)_{11}$  cluster isomers and calculated HOMO-LUMO gap values.

| Isomer      | Configuración                                                                                   | Relative energy, (Relative energy w/correction) eV | HOMO-LUMO gap, eV |
|-------------|-------------------------------------------------------------------------------------------------|----------------------------------------------------|-------------------|
| -           | $\text{Au}_4+\text{Au}_6(\text{SCH}_3)_6+\text{Au}_2(\text{SCH}_3)_3+\text{Au}(\text{SCH}_3)_2$ | - (0.000)                                          | 1.9996            |
| <b>Iso1</b> | $\text{Au}_4+\text{Au}_2(\text{SCH}_3)_3+\text{Au}_7(\text{SCH}_3)_8$                           | 0.000 (0.52)                                       | 2.4075            |
| <b>Iso2</b> | $\text{Au}_4+\text{Au}_4(\text{SCH}_3)_5+\text{Au}_5(\text{SCH}_3)_6$                           | 0.013                                              | 1.1432            |
| <b>Iso3</b> | $\text{Au}_3+\text{Au}_4(\text{SCH}_3)_5+\text{Au}_6(\text{SCH}_3)_6$                           | 0.170                                              | 1.9728            |
| <b>Iso4</b> | $\text{Au}_4+\text{Au}_3(\text{SCH}_3)_4+\text{Au}_6(\text{SCH}_3)_7$                           | 0.187                                              | 0.8575            |
| <b>Iso5</b> | $\text{Au}_6+3[\text{Au}_2(\text{SCH}_3)_3]+\text{Au}(\text{SCH}_3)_2$                          | 0.990                                              | 0.1868            |

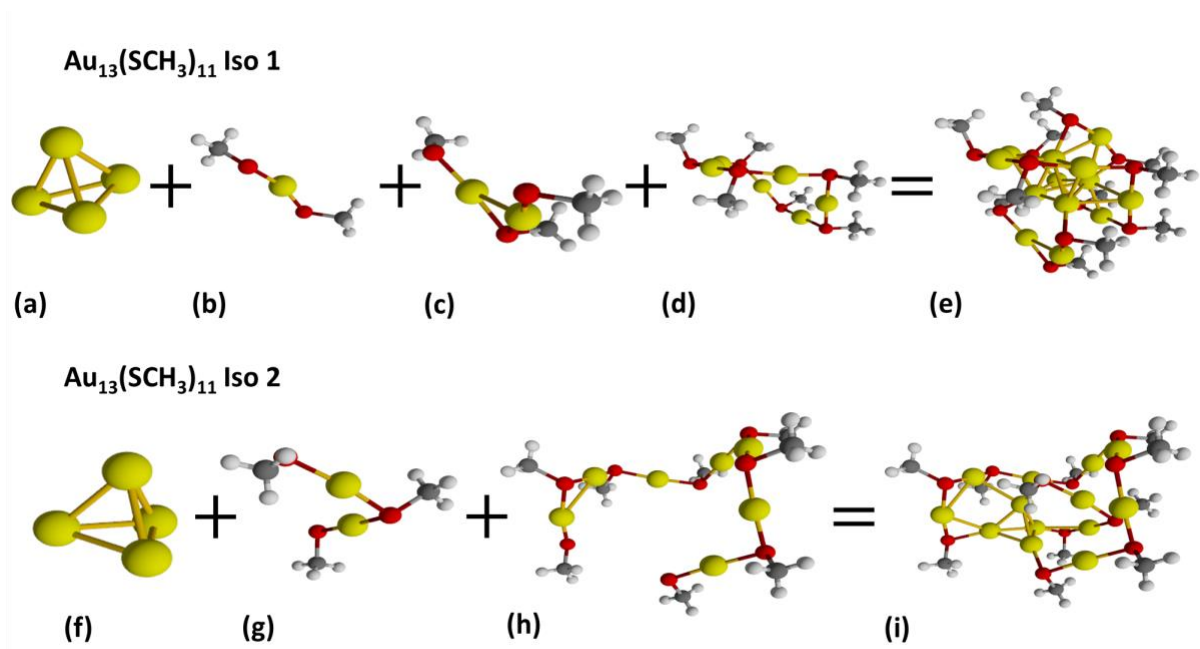

**FIG. S5.** Lowest energy isomers of  $\text{Au}_{13}(\text{SR})_{11}$  clusters with R= Methyl. (a) Tetrahedral core ( $\text{Au}_4$ ), (b) monomer motif ( $\text{Au}(\text{SCH}_3)_2$ ), (c) dimer motif  $\text{Au}_2(\text{SCH}_3)_3$ , (d) cyclomer ( $\text{Au}_6(\text{SCH}_3)_6$ ), cluster, (e) Iso 1 of  $\text{Au}_{13}(\text{SCH}_3)_{11}$  cluster, (f) Tetrahedral core ( $\text{Au}_4$ ), (g) dimer motif ( $\text{Au}_2(\text{SCH}_3)_3$ ), (h) heptamer motif ( $\text{Au}_7(\text{SCH}_3)_8$ ), (i) Iso 2 of  $\text{Au}_{13}(\text{SCH}_3)_{11}$  cluster . Color code: Gold atoms are shown in yellow, Sulphur atoms are red balls, Carbon atoms are displayed in gray, and Hydrogen atoms in white.

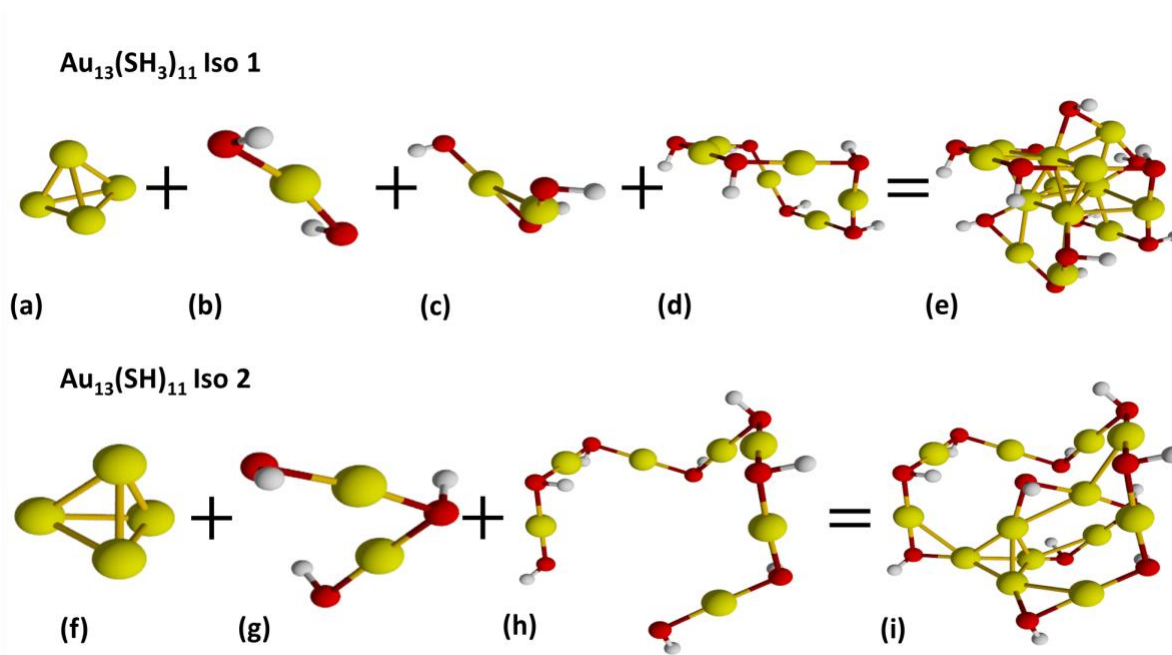

**FIG. S6.** Lowest energy isomers of  $\text{Au}_{13}(\text{SR})_{11}$  clusters with R= H. (a) Tetrahedral core ( $\text{Au}_4$ ), (b) monomer motif ( $\text{Au}(\text{SH})_2$ ), (c) dimer motif  $\text{Au}_2(\text{SH})_3$ , (d) cyclomer ( $\text{Au}_6(\text{SH})_6$ ), cluster, (e) Iso 1 of  $\text{Au}_{13}(\text{SH})_{11}$  cluster, (f) Tetrahedral core ( $\text{Au}_4$ ), (g) dimer motif ( $\text{Au}_2(\text{SH})_3$ ), (h) heptamer motif ( $\text{Au}_7(\text{SH})_8$ ), (i) Iso 2 of  $\text{Au}_{13}(\text{SH})_{11}$  cluster . Color code: Gold atoms are shown in yellow, Sulphur atoms are red balls, Carbon atoms are displayed in gray, and Hydrogen atoms in white.

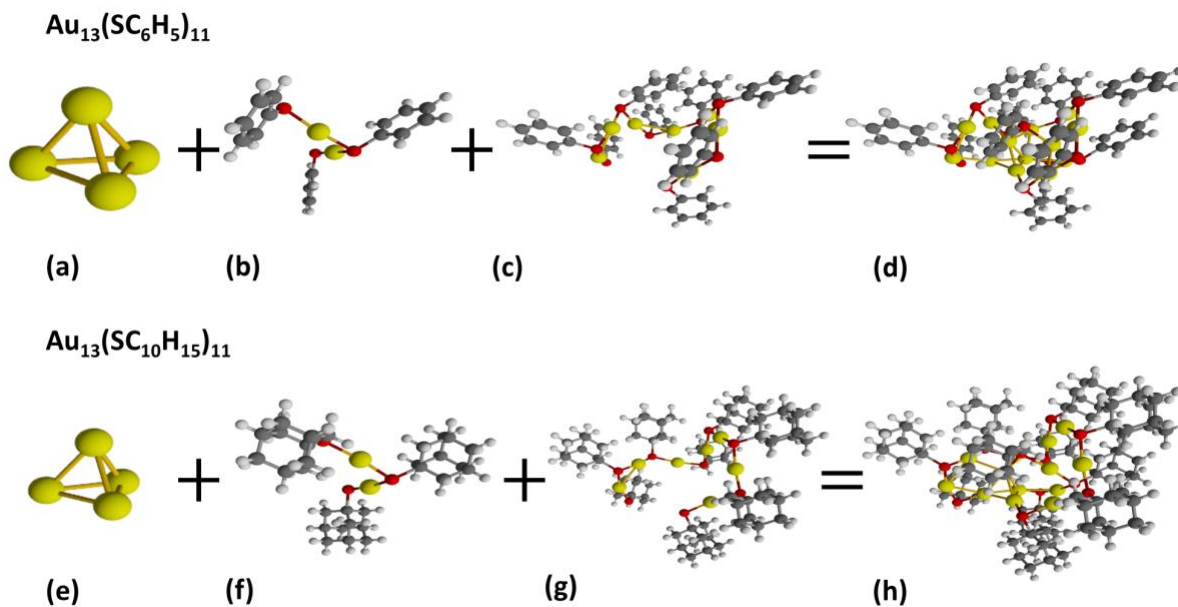

**FIG. S7.** Lowest energy isomers of  $\text{Au}_{13}(\text{SR})_{11}$  clusters with  $\text{R} = \text{Ph}$ , adamantyl. (a) Tetrahedral core ( $\text{Au}_4$ ), (b) dimer motif ( $\text{Au}_2(\text{SPh})_3$ ), (c) heptamer motif  $\text{Au}_7(\text{SPh})_8$ , (d)  $\text{Au}_{13}(\text{SC}_6\text{H}_5)_{11}$  cluster, (e) Tetrahedral core ( $\text{Au}_4$ ) cluster, (f) dimer motif ( $\text{Au}_2(\text{SC}_{10}\text{H}_{15})_3$ ), (g) heptamer motif ( $\text{Au}_7(\text{SC}_{10}\text{H}_{15})_8$ ), (h)  $\text{Au}_{13}(\text{SC}_{10}\text{H}_{15})_{11}$  cluster. Color code: Gold atoms are shown in yellow, Sulphur atoms are red balls, Carbon atoms are displayed in gray, and Hydrogen atoms in white.



### Lowest energy Au<sub>13</sub>(SCH<sub>3</sub>)<sub>11</sub> cluster

|    |          |          |          |
|----|----------|----------|----------|
| Au | -3.07362 | -0.32455 | -1.55762 |
| Au | 0.00013  | -1.56694 | 1.27244  |
| Au | -0.14492 | -0.79978 | -1.44721 |
| Au | -1.30040 | 0.72907  | 0.61153  |
| Au | 0.51994  | 2.70071  | 1.93982  |
| Au | 2.14958  | -3.31521 | 0.79888  |
| Au | -1.25100 | -3.43467 | -0.70811 |
| Au | -1.39476 | 2.96525  | -1.08288 |
| Au | 1.50803  | 0.56914  | 0.19071  |
| Au | 0.72877  | 0.80788  | -4.02945 |
| Au | 2.22585  | -0.38652 | 2.91760  |
| Au | 2.58033  | 2.42370  | -2.18754 |
| Au | -2.27462 | -0.66853 | 3.00533  |
| S  | -3.40233 | -2.58404 | -1.05162 |
| S  | 0.16374  | -1.41793 | -3.72476 |
| S  | 0.19773  | 4.16162  | 0.13926  |
| S  | 3.62234  | 1.53408  | -0.32286 |
| S  | 3.54314  | -2.22097 | 2.31442  |
| S  | 0.90848  | 1.33775  | 3.79842  |
| S  | 1.65196  | 2.93916  | -4.26365 |
| S  | 0.81501  | -4.53658 | -0.67087 |
| S  | -3.05375 | 1.88876  | -2.32953 |
| S  | -0.83152 | -2.44412 | 3.44187  |
| S  | -3.32349 | 1.16360  | 2.00529  |
| C  | 3.96886  | 2.85522  | 0.89350  |
| C  | 0.31570  | 4.16459  | -4.00984 |
| C  | -1.48811 | -1.69527 | -4.46545 |

|   |          |          |          |
|---|----------|----------|----------|
| C | -4.57146 | 2.54380  | -1.53288 |
| C | -0.76262 | 5.55831  | 0.84331  |
| C | 2.03670  | 2.30621  | 4.87152  |
| C | 4.91096  | -1.54423 | 1.30357  |
| C | 0.48670  | -6.09468 | 0.23865  |
| C | -4.21920 | -2.57827 | 0.58371  |
| C | -1.71910 | -4.00136 | 3.06551  |
| C | -2.99584 | 2.63940  | 3.03469  |
| H | 3.10297  | 3.51180  | 1.02554  |
| H | 4.21082  | 2.36733  | 1.84593  |
| H | 4.83156  | 3.43080  | 0.53837  |
| H | -0.32569 | 3.89205  | -3.16169 |
| H | -0.27994 | 4.20570  | -4.92904 |
| H | 0.78294  | 5.13844  | -3.82477 |
| H | -1.37274 | -1.72497 | -5.55510 |
| H | -1.85304 | -2.66329 | -4.10165 |
| H | -2.19171 | -0.90726 | -4.17916 |
| H | -5.43186 | 2.04088  | -1.98740 |
| H | -4.62309 | 3.62085  | -1.72818 |
| H | -4.55057 | 2.35139  | -0.45438 |
| H | -1.04777 | 6.22207  | 0.01950  |
| H | -1.65585 | 5.20283  | 1.36377  |
| H | -0.11203 | 6.09317  | 1.54440  |
| H | 2.92826  | 2.62876  | 4.32695  |
| H | 2.32532  | 1.66648  | 5.71295  |
| H | 1.48754  | 3.18021  | 5.23922  |
| H | 4.53629  | -0.88412 | 0.51507  |
| H | 5.45595  | -2.38995 | 0.87013  |

|   |          |          |          |
|---|----------|----------|----------|
| H | 5.57141  | -0.98216 | 1.97401  |
| H | 0.04926  | -5.89506 | 1.22020  |
| H | -0.20512 | -6.69376 | -0.36394 |
| H | 1.43842  | -6.62524 | 0.35481  |
| H | -4.39356 | -3.62038 | 0.87473  |
| H | -5.17655 | -2.05668 | 0.48080  |
| H | -3.60137 | -2.07060 | 1.33637  |
| H | -2.53742 | -4.13551 | 3.78122  |
| H | -0.99562 | -4.81894 | 3.17715  |
| H | -2.10721 | -3.99771 | 2.04105  |
| H | -1.93887 | 2.69707  | 3.31735  |
| H | -3.62266 | 2.59324  | 3.93169  |
| H | -3.26614 | 3.52124  | 2.44020  |

**Lowest energy Au<sub>11</sub>(SCH<sub>3</sub>)<sub>9</sub> cluster**

|    |           |           |           |
|----|-----------|-----------|-----------|
| Au | 0.437350  | 1.556385  | 3.186755  |
| Au | -1.209997 | -0.643088 | 1.868135  |
| Au | -0.553976 | 3.434415  | 1.570606  |
| Au | -0.163033 | 3.885199  | 4.293973  |
| Au | -1.385049 | 7.058258  | 3.898777  |
| Au | -1.793725 | 6.396676  | 0.824962  |
| Au | 2.092391  | -0.634745 | 2.474136  |
| Au | 3.248718  | 1.778996  | 4.267928  |
| Au | -3.301565 | 2.260655  | 2.372778  |
| Au | 0.570300  | 1.907010  | 6.519415  |
| Au | -2.684387 | 2.523097  | 5.473938  |
| S  | -0.307431 | 5.872425  | 5.568026  |
| S  | -2.464994 | 8.182235  | 2.164515  |
| S  | -0.964131 | 4.622955  | -0.415048 |

|   |           |           |           |
|---|-----------|-----------|-----------|
| S | 0.339222  | -2.136478 | 2.771969  |
| S | 3.920995  | 0.795377  | 2.259148  |
| S | -2.840613 | 0.617698  | 0.784071  |
| S | 2.741413  | 2.735848  | 6.324234  |
| S | -3.876754 | 3.861365  | 3.975935  |
| S | -1.578425 | 1.132838  | 6.974262  |
| C | -4.254994 | 7.902249  | 2.478810  |
| C | -2.421479 | 3.862371  | -1.229756 |
| C | 3.476066  | 2.002881  | 0.948227  |
| C | -4.330608 | -0.458731 | 0.790309  |
| C | 0.572761  | -3.391661 | 1.448323  |
| C | 3.746002  | 1.819172  | 7.557516  |
| C | 1.409048  | 6.525666  | 5.589952  |
| C | -1.678236 | -0.534128 | 6.206998  |
| C | -5.650503 | 3.557371  | 4.355608  |
| H | -4.801837 | 8.156074  | 1.563480  |
| H | -4.560653 | 8.573250  | 3.289452  |
| H | -4.451053 | 6.863533  | 2.760111  |
| H | -2.741124 | 4.532619  | -2.036274 |
| H | -3.239065 | 3.702651  | -0.521038 |
| H | -2.106102 | 2.899419  | -1.646167 |
| H | 3.531305  | 1.487690  | -0.017154 |
| H | 4.215275  | 2.810958  | 0.981395  |
| H | 2.469265  | 2.404902  | 1.108024  |
| H | -4.127019 | -1.323225 | 0.148135  |
| H | -5.161723 | 0.121742  | 0.373092  |
| H | -4.581006 | -0.793430 | 1.800249  |
| H | -0.330354 | -4.011432 | 1.413879  |

|   |           |           |          |
|---|-----------|-----------|----------|
| H | 1.435695  | -4.010111 | 1.720314 |
| H | 0.739322  | -2.922817 | 0.474856 |
| H | 4.796761  | 2.094537  | 7.409149 |
| H | 3.623427  | 0.737533  | 7.452419 |
| H | 3.417068  | 2.136996  | 8.553592 |
| H | 1.384584  | 7.516607  | 6.057652 |
| H | 1.822571  | 6.596120  | 4.580558 |
| H | 2.015480  | 5.840809  | 6.193929 |
| H | -2.714844 | -0.879032 | 6.297327 |
| H | -1.014863 | -1.202976 | 6.766097 |
| H | -1.385389 | -0.508132 | 5.152975 |
| H | -6.246703 | 3.947097  | 3.522318 |
| H | -5.893480 | 4.107639  | 5.271904 |
| H | -5.856515 | 2.493376  | 4.496605 |
